# Supplementary material for: First Global Report of Plasmid-Mediated mcr-1 and Extended-Spectrum Beta-Lactamase-Producing Escherichia coli from Sheep in Portugal
Source: MDPI journal article supplement (doi:10.3390/antibiotics10111403), 2021-11-16
Supplement: s1 [file s1]

## Supplementary Material

**Table S1.** Characterization of 62 ESBL-producing *E. coli* from sheep from Portugal

| Animal | Isolate | ESBL enzyme | $\beta$ -lactam resistance                  | Other resistance   | Other resistance genes                                                                   | Replicon content (Inc)                  | PG | PFGE pattern |
|--------|---------|-------------|---------------------------------------------|--------------------|------------------------------------------------------------------------------------------|-----------------------------------------|----|--------------|
| PTOV01 | Ov7     | SHV-12      | AML, CTX, CAZ, EFT, CPT, ATM                | TET                | <i>tetA</i>                                                                              | B/O, FIB, I1 $\gamma$ , K, FII          | B1 | L            |
| PTOV02 | Ov2     | CTX-M-1     | AML, CTX, EFT, FEP, CPT                     | -                  | -                                                                                        | L                                       | A  | A            |
| PTOV02 | Ov3     | CTX-M-32    | AML, CTX, EFT, CPT                          | GEN, TET           | <i>aac(6')Ib-cr</i> , <i>aac(3')-II</i> , <i>aph(3')-III</i> , <i>tetA</i> , <i>tetB</i> | HI1, FII                                | A  | AE           |
| PTOV02 | Ov25    | CTX-M-15    | AML, AMC, CTX, EFT, CPT, ATM                | SXT, TET           | <i>sul2</i> , <i>tetA</i>                                                                | FIB, Y, X2, FII                         | A  | AC           |
| PTOV03 | Ov4     | CTX-M-98    | AML, CTX, EFT, CPT                          | CIP, SXT, TET      | <i>aac(6')Ib-cr</i> , <i>sul1</i> , <i>sul2</i> , <i>tetA</i>                            | FIB, FIA, I1 $\gamma$ , FII             | A  | M            |
| PTOV03 | Ov5     | CTX-M-15    | AML, AMC, CTX, EFT, CPT, ATM                | SXT, TET           | <i>sul2</i> , <i>tetA</i>                                                                | FIB, L, Y, X2, FII                      | A  | AC           |
| PTOV03 | Ov6     | CTX-M-32    | AML, AMC, CTX, EFT, CPT                     | SXT, TET           | <i>sul3</i> , <i>tetB</i>                                                                | FIB, L, X2, FII                         | A  | H            |
| PTOV04 | Ov8     | CTX-M-15    | AML, AMC, CTX, EFT, FEP, CPT, ATM           | SXT, TET           | <i>sul2</i> , <i>tetA</i>                                                                | FIB, L, Y, X2, FII                      | A  | AC           |
| PTOV04 | Ov9     | CTX-M-15    | AML, AMC, CTX, CAZ, EFT, CPT, ATM           | SXT, TET           | <i>sul2</i> , <i>tetA</i>                                                                | FIB, L, Y, X2, FII                      | A  | AC           |
| PTOV04 | Ov10    | CTX-M-15    | AML, AMC, CTX, EFT, CPT, ATM                | CIP, SXT, TET      | <i>aac(6')Ib-cr</i> , <i>sul1</i> , <i>tetB</i>                                          | FIB, FIA, I1 $\gamma$ , Y, FII          | A  | Q            |
| PTOV05 | Ov11    | CTX-M-1     | AML, AMC, CTX, CAZ, EFT, FEP, CPT, ATM, FOX | FUR, COL           | <i>aac(6')Ib-cr</i> , <i>mcr-1</i>                                                       | I1 $\gamma$ , X1                        | B1 | W            |
| PTOV05 | Ov12    | CTX-M-15    | AML, AMC, CTX, CAZ, EFT, CPT, ATM           | SXT, TET           | <i>sul2</i> , <i>tetA</i>                                                                | FIB, L, X2                              | A  | Z            |
| PTOV05 | Ov13    | CTX-M-32    | AML, CTX, CAZ, EFT, FEP, CPT, ATM           | CIP, GEN, TET, FUR | <i>aac(6')Ib-cr</i> , <i>aac(3)-II</i> , <i>sul1</i> , <i>tetB</i>                       | L                                       | A  | AF           |
| PTOV05 | Ov64    | CTX-M-32    | AML, AMC, CTX, CAZ, EFT, FEP, CPT, ATM      | CIP, GEN, TET      | <i>aac(6')Ib-cr</i> , <i>aac(3)-II</i> , <i>tetB</i>                                     | I1 $\alpha$ , L, I1 $\gamma$            | A  | S            |
| PTOV06 | Ov14    | CTX-M-14    | AML, AMC, CTX, EFT, CPT                     | CIP, SXT, TET      | <i>aac(6')Ib-cr</i> , <i>sul1</i> , <i>sul2</i> , <i>tetA</i>                            | I1 $\alpha$ , FIB, P, I1 $\gamma$ , FII | A  | N            |
| PTOV06 | Ov15    | CTX-M-15    | AML, AMC, CTX, CAZ, EFT, CPT, ATM           | SXT, TET           | <i>aac(6')Ib-cr</i> , <i>sul2</i> , <i>tetA</i>                                          | FIB, L, Y, X2, FII                      | A  | AC           |
| PTOV06 | Ov16    | CTX-M-32    | AML, CTX, EFT, CPT, ATM                     | SXT, TET           | <i>sul1</i> , <i>sul3</i> , <i>tetB</i>                                                  | L                                       | A  | AF           |
| PTOV06 | Ov65    | CTX-M-32    | AML, CTX, EFT, CPT, ATM                     | CIP, GEN, TET      | <i>aac(6')Ib-cr</i> , <i>aac(3)-II</i> , <i>tetB</i>                                     | I1 $\alpha$ , L, I1 $\gamma$            | A  | S            |
| PTOV07 | Ov17    | CTX-M-15    | AML, AMC, CTX, EFT, CPT, ATM                | SXT, TET           | <i>sul2</i> , <i>tetA</i>                                                                | FIB, L, Y, X2, FII                      | A  | AC           |
| PTOV07 | Ov18    | CTX-M-32    | AML, CTX, EFT, FEP, CPT, ATM                | CIP, SXT, TET      | <i>aac(6')Ib-cr</i> , <i>sul3</i> , <i>tetA</i>                                          | -                                       | B1 | X            |
| PTOV07 | Ov19    | CTX-M-32    | AML, CTX, CAZ, EFT, CPT, ATM                | CIP, GEN, TET      | <i>aac(6')Ib-cr</i> , <i>aac(3)-II</i> , <i>tetB</i>                                     | I1 $\alpha$ , L, I1 $\gamma$            | A  | D            |
| PTOV07 | Ov20    | CTX-M-1     | AML, AMC, CTX, EFT, CPT                     | SXT                | <i>sul2</i>                                                                              | I1 $\alpha$ , FIB, X1, FII              | B1 | G            |
| PTOV07 | Ov21    | CTX-M-15    | AML, AMC, CTX, EFT, CPT                     | CIP, SXT, TET      | <i>aac(6')Ib-cr</i> , <i>sul3</i> , <i>tetA</i>                                          | L, X3, FII                              | A  | AG           |
| PTOV07 | Ov22    | CTX-M-15    | AML, AMC, CTX, EFT, CPT                     | SXT, TET           | <i>sul2</i> , <i>tetA</i>                                                                | FIB, L, Y, X2, FII                      | A  | AC           |
| PTOV07 | Ov23    | CTX-M-15    | AML, CTX, EFT, CPT                          | CIP, SXT           | <i>aac(6')Ib-cr</i> , <i>sul2</i>                                                        | I1 $\alpha$ , FIB, P, I1 $\gamma$ , FII | A  | O            |
| PTOV07 | Ov24    | CTX-M-15    | AML, AMC, CTX, EFT, FEP, CPT, ATM           | SXT, TET           | <i>sul2</i> , <i>tetA</i>                                                                | FIB, L                                  | A  | AA           |
| PTOV07 | Ov66    | CTX-M-32    | AML, AMC, CTX, EFT, CPT                     | GEN, TET           | <i>aac(6')Ib-cr</i> , <i>aac(3)-II</i> , <i>aph(3)-III</i> , <i>tetA</i> , <i>tetB</i>   | HI1, FII                                | A  | AE           |
| PTOV08 | Ov26    | CTX-M-32    | AML, CTX, EFT, FEP, CPT, ATM                | TET                | <i>tetA</i>                                                                              | N, FIB, I1 $\gamma$ , FII               | B1 | C            |
| PTOV08 | Ov27    | CTX-M-15    | AML, CTX, CAZ, EFT, CPT, ATM                | CIP, SXT, TET      | <i>aac(6')Ib-cr</i> , <i>sul1</i> , <i>tetB</i>                                          | FIB, FIA, I1 $\gamma$                   | A  | R            |
| PTOV08 | Ov28    | CTX-M-15    | AML, AMC, CTX, EFT, CPT, ATM                | TET                | <i>tetA</i>                                                                              | FIB, L, Y, X2, FII                      | A  | AC           |
| PTOV08 | Ov29    | CTX-M-32    | AML, AMC, CTX, CAZ, EFT, CPT, ATM           | TET                | <i>tetB</i>                                                                              | N, I1 $\gamma$ , FII                    | A  | U            |
| PTOV10 | Ov30    | CTX-M-32    | AML, AMC, CTX, EFT, CPT                     | SXT, TET, FUR      | <i>sul1</i> , <i>tetB</i>                                                                | L                                       | A  | AF           |
| PTOV11 | Ov31    | CTX-M-32    | AML, AMC, CTX, EFT, CPT, ATM                | SXT, TET, CHL      | <i>sul1</i> , <i>sul2</i>                                                                | L                                       | A  | AF           |
| PTOV11 | Ov32    | CTX-M-32    | AML, AMC, CTX, CAZ, EFT, FEP, CPT, ATM      | -                  | -                                                                                        | N, I1 $\gamma$                          | D  | AB           |
| PTOV11 | Ov33    | CTX-M-15    | AML, AMC, CTX, CAZ, EFT, FEP, CPT, ATM      | SXT, TET           | <i>aac(6')Ib-cr</i> , <i>sul2</i> , <i>tetA</i>                                          | FIB, L, Y, X2, FII                      | A  | AC           |
| PTOV12 | Ov34    | CTX-M-1     | AML, CTX, EFT, CPT, ATM                     | TET                | <i>tetB</i>                                                                              | N, I1 $\gamma$                          | B1 | P            |
| PTOV13 | Ov35    | CTX-M-32    | AML, AMC, CTX, EFT, FEP, CPT, ATM           | CIP, SXT, TET      | <i>sul3</i>                                                                              | R                                       | B1 | T            |

|        |      |                  |                                        |                    |                                                   |                                                |    |    |
|--------|------|------------------|----------------------------------------|--------------------|---------------------------------------------------|------------------------------------------------|----|----|
| PTOV13 | Ov36 | CTX-M-32         | AML, AMC, CTX, CAZ, EFT, CPT, ATM      | -                  | -                                                 | N, L                                           | A  | I  |
| PTOV13 | Ov37 | SHV-12           | AML, CTX, CAZ, ATM                     | TET                | <i>tetA</i>                                       | N, FIB, II $\gamma$ , K, FII                   | B1 | L  |
| PTOV13 | Ov38 | SHV-12           | AML, CTX, CAZ, ATM                     | CIP, TET           | -                                                 | II $\alpha$ , N, FIB, II $\gamma$ , Y, X2, FII | A  | V  |
| PTOV13 | Ov39 | CTX-M-15         | AML, AMC, CTX, EFT, FEP, CPT, ATM      | SXT                | <i>sul2</i>                                       | FIB, L, Y, X2, FII                             | A  | AC |
| PTOV13 | Ov40 | CTX-M-15         | AML, CTX, CAZ, EFT, FEP, CPT, ATM      | SXT, TET           | <i>sul2, tetA</i>                                 | II $\gamma$ , Y                                | B1 | F  |
| PTOV15 | Ov67 | CTX-M-32         | AML, AMC, CTX, CAZ, EFT, CPT, ATM      | CIP, GEN, TET      | <i>aac(6')Ib-cr, aac(3)-II, tetB</i>              | II $\alpha$ , L, II $\gamma$                   | A  | S  |
| PTOV15 | Ov42 | CTX-M-15         | AML, AMC, CTX, CAZ, EFT, FEP, CPT, ATM | GEN, SXT, TET, FUR | <i>aac(6')Ib-cr, qnrS, aph(3)-III, sul2, tetA</i> | FIB, L, Y, X2, FII                             | A  | AC |
| PTOV15 | Ov44 | CTX-M-32         | AML, AMC, CTX, CAZ, EFT, CPT, ATM      | GEN                | <i>aac(6')Ib-cr, aac(3)-II</i>                    | II $\alpha$ , II $\gamma$                      | B1 | E  |
| PTOV15 | Ov45 | CTX-M-32, SHV-12 | AML, AMC, CTX, CAZ, ATM                | SXT, TET           | <i>sul1, sul2, tetA</i>                           | II $\gamma$ , Y                                | B1 | J  |
| PTOV16 | Ov46 | CTX-M-1          | AML, AMC, CTX, EFT, CPT,               | TET                | <i>tetA, tetB</i>                                 | II $\alpha$ , FIB, II $\gamma$ , FII           | B1 | K  |
| PTOV16 | Ov47 | CTX-M-15         | AML, AMC, CTX, CAZ, EFT, CPT, ATM      | SXT, TET           | <i>sul2, tetA</i>                                 | FIB, L, Y, X2, FII                             | A  | AC |
| PTOV17 | Ov49 | CTX-M-32         | AML, AMC, CTX, EFT, FEP, CPT, ATM      | SXT, TET           | <i>sul3, tetB</i>                                 | FIB, Y, FII                                    | A  | H  |
| PTOV17 | Ov51 | CTX-M-15         | AML, CTX, CAZ, EFT, CPT, ATM           | SXT                | <i>sul2, sul3</i>                                 | FIB, L, Y, X2, FII                             | A  | AC |
| PTOV17 | Ov52 | SHV-12           | AML, CTX, CAZ, EFT, ATM                | TET, CHL           | <i>tetA</i>                                       | II $\alpha$ , II $\gamma$                      | B1 | Y  |
| PTOV17 | Ov63 | CTX-M-32         | AML, AMC, CTX, CAZ, EFT, CPT, ATM      | CIP, GEN, TET      | <i>aac(6')Ib-cr, aac(3)-II, tetB</i>              | II $\alpha$ , L, II $\gamma$                   | A  | S  |
| PTOV18 | Ov53 | CTX-M-15         | AML, CTX, EFT, CPT                     | TET                | <i>tetA</i>                                       | L                                              | A  | AD |
| PTOV18 | Ov54 | CTX-M-15         | AML, AMC, CTX, EFT, CPT                | SXT, TET           | <i>sul2, tetA</i>                                 | FIB, L, Y, X2                                  | A  | AC |
| PTOV18 | Ov55 | CTX-M-15         | AML, CTX, EFT, CPT, ATM                | SXT, TET           | <i>sul2, tetA</i>                                 | II $\gamma$ , Y                                | B1 | F  |
| PTOV18 | Ov56 | CTX-M-32         | AML, CTX, EFT, CPT, ATM                | SXT, TET           | <i>sul1, sul3, tetB</i>                           | L                                              | A  | AF |
| PTOV19 | Ov57 | CTX-M-32         | AML, CTX, EFT, CPT                     | SXT, TET           | <i>sul1, sul3, tetB</i>                           | L                                              | A  | AF |
| PTOV19 | Ov58 | CTX-M-32         | AML, CTX, CAZ, EFT, FEP, CPT, ATM      | SXT, TET, CHL      | <i>sul1, sul2, sul3, tetB</i>                     | HI1, FIB, II $\gamma$ , FII                    | A  | B  |
| PTOV19 | Ov59 | CTX-M-15         | AML, CTX, CAZ, EFT, FEP, CPT, ATM      | SXT, TET           | <i>sul2, tetA</i>                                 | FIB, L, Y, X2, FII                             | A  | AC |
| PTOV20 | Ov61 | CTX-M-15         | AML, AMC, CTX, CAZ, EFT, FEP, CPT, ATM | CIP, SXT, TET, FUR | <i>aac(6')Ib-cr, qnrS, sul2, tetA</i>             | FIB, L, Y, X2, FII                             | A  | AC |
| PTOV20 | Ov69 | CTX-M-32         | AML, AMC, CTX, CAZ, EFT, CPT, ATM      | CIP, GEN, TET      | <i>aac(6')Ib-cr, aac(3)-II, tetB</i>              | II $\alpha$ , L, II $\gamma$                   | A  | S  |
| PTOV21 | Ov62 | CTX-M-32         | AML, CTX, CAZ, EFT, FEP, CPT, ATM      | SXT, TET           | <i>sul2, tetA</i>                                 | N, L, II $\gamma$ , Y                          | B1 | F  |

AML – amoxicillin, AMC – amoxicillin-clavulanic acid, CTX – cefotaxime, CAZ – ceftazidime, EFT – ceftiofur, FEP – cefepime, CPT – ceftaroline, ATM – aztreonam, FOX – ceftiofur, CIP – ciprofloxacin, GEN – gentamicin, SXT – sulfamethoxazole-trimethoprim, TET – tetracycline, CHL – chloramphenicol, FUR – nitrofurantoin.  
PG: phylogroup.

**Table S2:** List of primers used in the standard PCRs assays.

| Aim                 | Target                         | Primer Name   | Primer Sequence (5'-3')    | Amplicon Size (pb) | Annealing (T) | Reference |
|---------------------|--------------------------------|---------------|----------------------------|--------------------|---------------|-----------|
| Colistin resistance | <i>mcr-1</i>                   | MCR-1 F       | AGTCCGTTTGTTCTGTGGC        | 320                | 58°C          | [47]      |
|                     |                                | MCR-1 R       | AGATCCTTGGTCTCGGCTTG       |                    |               |           |
|                     | <i>mcr-2</i>                   | MCR2-F        | CAAGTGTGTTGGTCGAGTT        | 715                | 58°C          | [47]      |
|                     |                                | MCR2-R        | TCTAGCCCCGACAAGCATACC      |                    |               |           |
|                     | <i>mcr-3</i>                   | MCR3-F        | AAATAAAAATTGTTCCGCTTATG    | 929                | 58°C          | [47]      |
|                     |                                | MCR3-R        | AATGGAGATCCCCGTTTTT        |                    |               |           |
|                     | <i>mcr-4</i>                   | MCR4-F        | TCACTTTCATCACTGCGTTG       | 1116               | 58°C          | [47]      |
|                     |                                | MCR4-R        | TGGTCCATGACTACCAATG        |                    |               |           |
|                     | <i>mcr-5</i>                   | MCR5-F        | ATGCGGTTGTCTGCATTATC       | 1644               | 58°C          | [47]      |
|                     |                                | MCR5-R        | TCATTGTGGTTGCTCTTTCTG      |                    |               |           |
| Beta-lactamases     | <i>bla</i> <sub>CTX-M</sub> G1 | MP CTX-M G1 F | AAA AAT CAC TGC GCC AGT TC | 415                | 52°C          | [48]      |
|                     |                                | MP CTX-M G1 R | AGC TTA TTC ATC GCC ACG TT |                    |               |           |
|                     | <i>bla</i> <sub>CTX-M</sub> G2 | MP CTX-M G2 F | CGA CGC TAC CCC TGC TAT T  | 552                | 52°C          | [48]      |
|                     |                                | MP CTX-M G2 R | CCA GCG TCA GAT TTT TCA GG |                    |               |           |
|                     | <i>bla</i> <sub>CTX-M</sub> G8 | MP CTX-M G8 F | CGT TAA GCG GAT GAT GC     | 666                | 52°C          | [48]      |
|                     |                                | MP CTX-M G8 R | AAC CCA CGA TGT GGG TAG C  |                    |               |           |
|                     | <i>bla</i> <sub>CTX-M</sub> G9 | MP CTX-M G9 F | CAA AGA GAG TGC AAC GGA TG | 205                | 52°C          | [48]      |
|                     |                                | MP CTX-M G9 R | ATT GGA AAG CGT TCA TCA CC |                    |               |           |

|                                   |                                 |                                  |                                                     |     |      |      |
|-----------------------------------|---------------------------------|----------------------------------|-----------------------------------------------------|-----|------|------|
|                                   | <i>bla</i> <sub>CTX-M G25</sub> | MP CTX-M G25 F<br>MP CTX-M G25 R | GCA CGA TGA CAT TCG GG<br>AAC CCA CGA TGT GGG TAG C | 327 | 52°C | [48] |
|                                   | <i>bla</i> <sub>OXA</sub>       | OXA F<br>OXA R                   | CATTTCGGTGTGCGCCCTTATTC<br>CGTTCATCCATAGTTGCCTGAC   | 800 | 57°C | [49] |
|                                   | <i>bla</i> <sub>TEM</sub>       | TEM F<br>TEM R                   | AGCCGCTTGAGCAAATTAAC<br>ATCCCGCAGATAAATCACCAC       | 713 | 57°C | [49] |
|                                   | <i>bla</i> <sub>SHV</sub>       | SHV F<br>SHV R                   | GGCACCAGATTCAACTTTCAAG<br>GACCCCAAGTTTCTCTGTAAGTG   | 564 | 57°C | [49] |
| Quinolone resistance              | <i>qnrA</i>                     | qnrA F<br>qnrA R                 | GGATGCCAGTTTCGAGGA<br>TGCCAGGCACAGATCTTG            | 492 | 59°C | [52] |
|                                   | <i>qnrB</i> (1-6)               | qnrB (1-6) F<br>qnrB (1-6) R     | GGMATHGAAATTCGCCACTG<br>TTTGCYGYCGCCAGTCGAA         | 580 | 57°C | [53] |
|                                   | <i>qnrS</i> (1-2)               | qnrS (1-2) R<br>qnrS (1-2) F     | GATCTAAACCGTCGAGTTCGG<br>TCGACGTGCTAACTTGCG         | 466 | 57°C | [52] |
|                                   | <i>aac6'</i> <i>Ib-cr</i>       | aac-cr- F<br>aac-cr-R            | TTGCGATGCTCTATGAGTGG<br>GCGTGTCGCTCGAATGCC          | 400 | 57°C | [54] |
|                                   |                                 |                                  |                                                     |     |      |      |
| Aminoglycoside resistance         | <i>aac</i> (3)-II               | aac(3)-II 1<br>aac(3)-II 2       | GTCGAACAGGTAGCACTGAG<br>TGAAACGCTGACGGAGCCTC        | 568 | 63°C | [55] |
|                                   | <i>aac</i> (3)-IV               | aac(3)-IV- F<br>aac(3)-IV- R     | GTGTGCTGTGGTCCACAGC<br>AGTTGACCCAGGGCTGTCGC         | 705 | 55°C | [56] |
|                                   | <i>ant</i> (2'')-I              | ant(2'')-I F<br>ant(2'')-I R     | GGGCGCGTCATGGAGGAGTT<br>TATCGCGACCTGAAAGCGGC        |     | 68°C | [57] |
|                                   | <i>aph</i> (3')-I               | aph(3')-I F<br>aph(3')-I R       | GCCGATGTGGATTGCGAAAA<br>GCTTGATCCCCAGTAAGTCA        |     | 68°C | [58] |
|                                   | <i>aph</i> (3')-II              | aph(3')-II F<br>aph(3')-II R     | GCTATTCGGCTATGACTGGGC<br>CCACCATGATATTCGGCAAGC      |     | 63°C | [59] |
|                                   | <i>aph</i> (3')-III             | aph(3')-III F<br>aph(3')-III R   | AACGCTCTGTCTCGAGGCCGCG<br>GGCAAGATCCTGTGATCGGTC     |     | 53°C | [60] |
| Tetracycline resistance           | <i>tetA</i>                     | tetA 1<br>tetA 2                 | GTAATTCTGAGCACTGTTCGC<br>CTGCCTGGACAACATTGCTT       | 950 | 57°C | [61] |
|                                   | <i>tetB</i>                     | tetB 1<br>tetB 2                 | CTCAGTATTCCAAGCCTTTG<br>ACTCCCTGAGCTTGAGGGG         | 430 | 53°C | [62] |
| Sulphonamide resistance           | <i>sul1</i>                     | sul1 F<br>sul1 R                 | TGAGATCAGACGTATTGCGC<br>TTGAAGGTTTCGACAGCACGT       | 400 | 59°C | [63] |
|                                   | <i>sul2</i>                     | sul 2 F<br>sul 2 R               | GCGCTCAAGGCAGATGGCATT<br>GCGTTTGATACCGGCACCCGT      | 270 | 70°C | [59] |
|                                   | <i>sul3</i>                     | sul 3 F<br>sul 3 R               | CATCTGCAGCTAACCTAGGGCTTTGGA<br>GAGCAAGATTTTGGAAATCG | 990 | 53°C | [64] |
|                                   |                                 |                                  |                                                     |     |      |      |
| <i>E. coli</i> Phylogenetic Group | <i>chuA</i>                     | ChuA.1b<br>ChuA.2                | ATGGTACCGGACGAACCAAC<br>TGCCGCCAGTACCAAAGACA        | 288 | 59°C | [65] |
|                                   | <i>yjaA</i>                     | YjaA.1b<br>YjaA.2b               | CAAACGTGAAGTGTCAGGAG<br>AATGCGTTCCTCAACCTGTG        | 211 | 59°C | [65] |
|                                   | <i>arpA</i>                     | AceK.f<br>ArpA1.r                | AACGCTATTGCGCAGCTTGC<br>TCTCCCCATACCGTACGCTA        | 400 | 59°C | [65] |
|                                   | TspE4C2                         | TspE4C2.1b<br>TspE4C2.2b         | CACTATTTCGTAAGGTCATCC<br>AGTTTATCGTGC GGTCGC        | 152 | 59°C | [65] |
|                                   |                                 |                                  |                                                     |     |      |      |

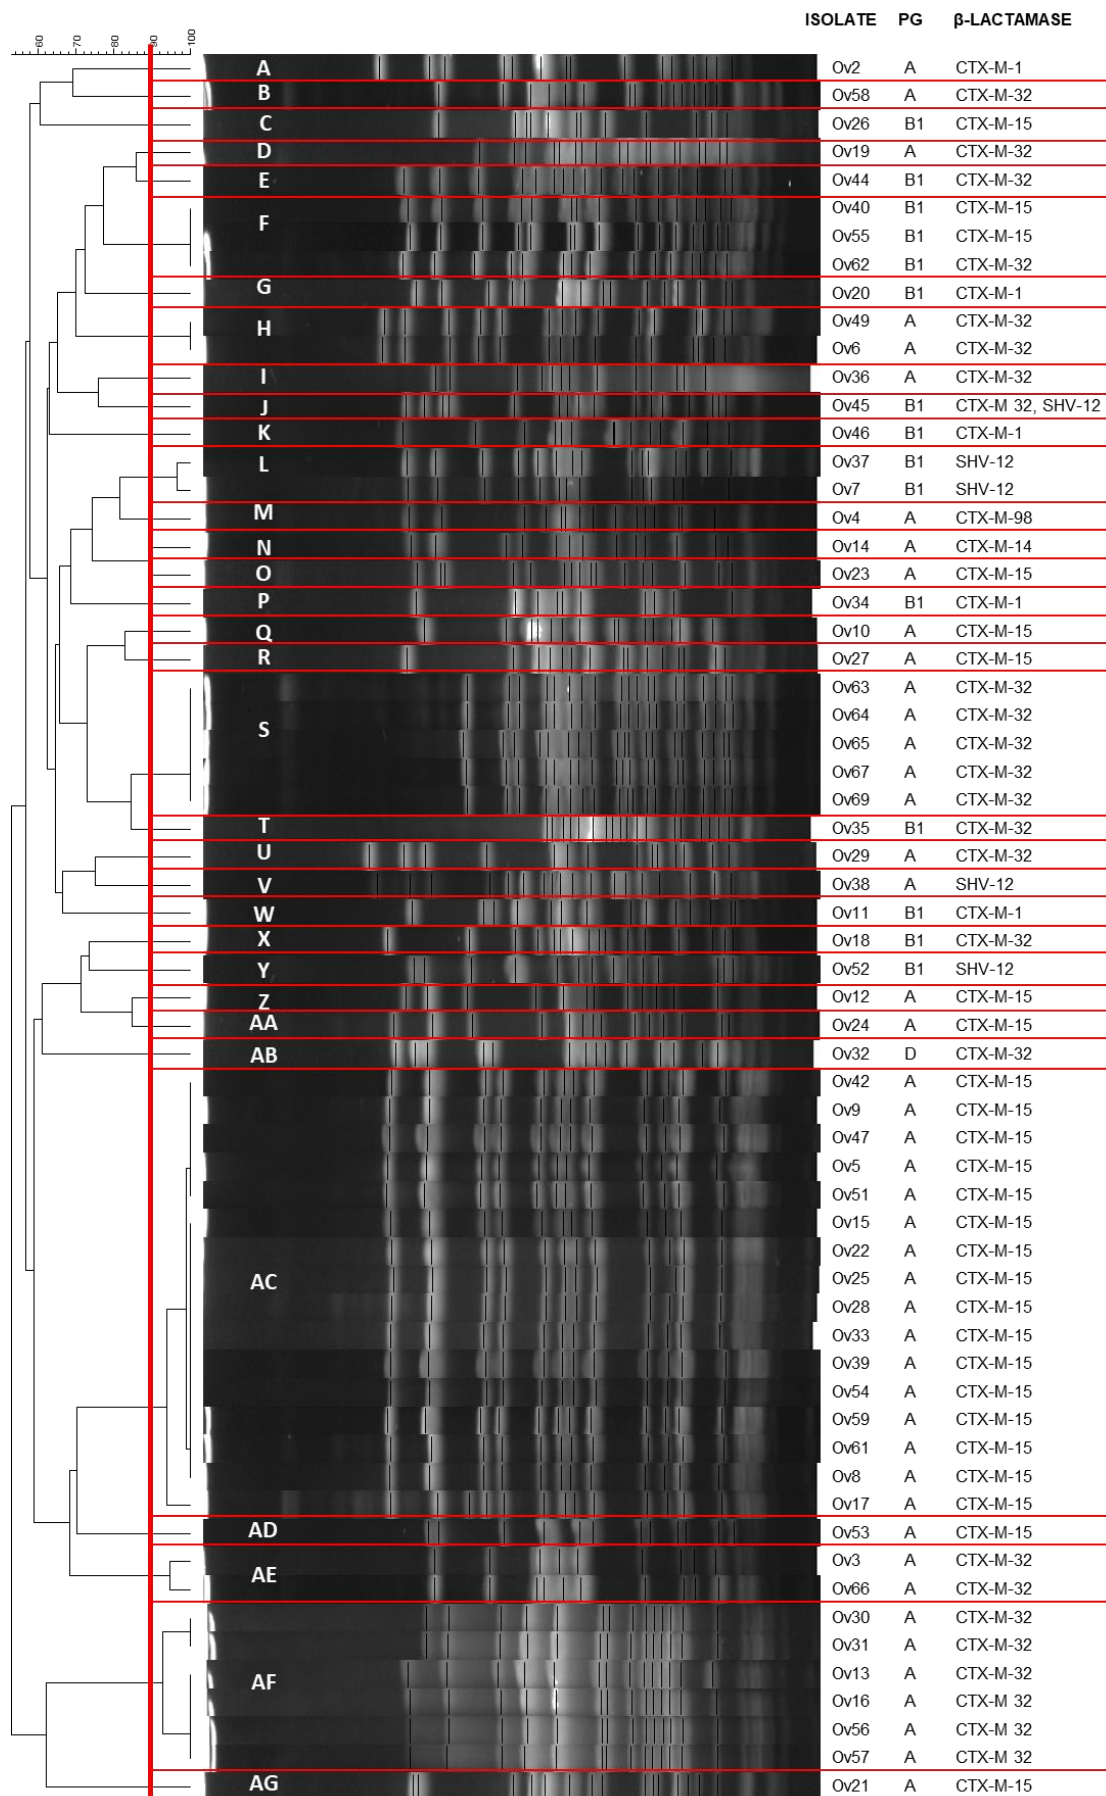

PG – Phylogenetic group

**Figure S1.** Clonal relation of 62 ESBL-producing *E. coli* from sheep from Portugal
